# Supplementary material for: MADE-in: a new aerosol microphysics submodel for global simulation of insoluble particles and their mixing state
Source: Copernicus journal article supplement (doi:10.5194/gmd-4-325-2011), 2011-04-21
Supplement: Supplementary file 1 [file MADE-in-namelist.pdf › Aquila-et-al-SM/MADE-in-namelist.pdf]

# MADE-IN namelist

For the simulations included in this work, we used the following setting in the namelist of MADE-IN:

- Control  
`lmade = .true.:` call MADE  
`lbctime = .true.:` enable diagnostic on BC and dust aging time
- Coupling with radiation  
`laerorad = .true.:` calculate aerosol optical properties  
`rad_sw_filename = '<filename>':` lookup table for shortwave radiation  
`rad_lw_filename = '<filename>':` lookup table for longwave radiation  
`rad_diag_wavelen = 0.550:` wavelenght [ $\mu\text{m}$ ] for optional diagnostic output
- Coupling with clouds  
`lcloudphysics = .true.:` calculate cloud droplet number concentration  
`act_scheme = 1:` activation scheme. 1 = Abdul-Razzak and Ghan (2000); 2 = Lin and Leaitch (1997)
- Coupling with chemistry  
`lcpl_gasphase = .true.:` coupling with gas phase chemistry  
`chemmodule = 'mecca':` name of chemistry module  
Define gas phase tracer used from chemistry module as 'tracename', 'sub-name'  
`H2SO4_gas = 'H2SO4', ''`  
`HN03_gas = 'HN03', ''`
- Offline emissions  
`SOA_stream = 'offlem':` name of stream for SOA emissions  
`SOA_element = 'RGT0099_soa_emiss':` stream element of SOA emissions
- Online emissions  
`lcalc_emis = .true.:` switch for online emissions  
`lss = .true.:` calculate online sea salt emission  
`SSemis_stream = 'onlem':` stream name for sea salt emission  
`SS_mass_as = 'mss_as_lsce':` stream element for sea salt mass in the accumulation mode  
`SS_num_as = 'nss_as_lsce':` stream element for sea salt number in the accumulation mode  
`SS_mass_cs = 'mss_cs_lsce':` stream element for sea salt mass in the

```
coarse mode
SS_num_cs = 'nss_cs_lsce': stream element for sea salt number in the
coarse mode
l_dust = .false.: calculate online dust emissions
```

## References

- Abdul-Razzak, H. and Ghan, S.: A parameterization of aerosol activation. 2. Multiple aerosol types, *J. Geophys. Res.*, 105(D5), 6837–6844, 2000.
- Lin, H. and Leaitch, W. R.: Development of an in-cloud aerosol activation parameterization for climate modelling, in: *Proc. WMO Workshop on Measurement of Cloud Properties for Forecasts of Weather, Air Quality and Climate*, pp. 328–355, World Meteorology Organization, Geneva, Switzerland, 1997.
