# Supplementary material for: MADE-in: a new aerosol microphysics submodel for global simulation of insoluble particles and their mixing state
Source: Copernicus journal article supplement (doi:10.5194/gmd-4-325-2011), 2011-04-21
Supplement: Supplementary file 3 [file README-SM.pdf › Aquila-et-al-SM/README-SM.pdf]

The supplementary material consists of the following documents:

- MADE-in-namelist.pdf: This document contains the MADE-in namelist used in our simulations. Next to each entry a short explanation of the possible choices is given. The namelist is relevant for EMAC users to reproduce the performed simulations.
- MECCA-gas-phase-reactions.pdf: list of reactions considered by the chemistry sub-model MECCA in our simulations. In the setup we used, MECCA calculates only gas phase chemistry. This file is automatically generated by EMAC/MADE-in during the compiling of the model. Empty tables are to be ignored.
- SCAV-gas-phase-reactions.pdf: list of reactions considered by the scavenging submodel SCAV in our simulations. In the setup we used, SCAV calculates the heterogeneous chemistry and liquid phase chemistry. This file is automatically generated by EMAC/MADE-in during the compiling of the model. Empty tables are to be ignored.
